# Supplementary material for: Going to extremes: the Goldilocks/Lagom principle and data distribution
Source: PubMed Central journal article supplement — BMJ Open. 2019 Nov 27;9(11):e027767. doi: 10.1136/bmjopen-2018-027767 (PMC6887037; doi:10.1136/bmjopen-2018-027767), 2019-11-27
Supplement: bmjopen-2018-027767.draft_revisions.pdf [file bmjopen-2018-027767.draft_revisions.pdf]

# BMJ Open

BMJ Open is committed to open peer review. As part of this commitment we make the peer review history of every article we publish publicly available.

When an article is published we post the peer reviewers' comments and the authors' responses online. We also post the versions of the paper that were used during peer review. These are the versions that the peer review comments apply to.

The versions of the paper that follow are the versions that were submitted during the peer review process. They are not the versions of record or the final published versions. They should not be cited or distributed as the published version of this manuscript.

BMJ Open is an open access journal and the full, final, typeset and author-corrected version of record of the manuscript is available on our site with no access controls, subscription charges or pay-per-view fees (<http://bmjopen.bmj.com>).

If you have any questions on BMJ Open's open peer review process please email [info.bmjopen@bmj.com](mailto:info.bmjopen@bmj.com)

# BMJ Open

## Going to extremes: the Goldilocks/Lagom principle and data distribution

|                                 |                                                                                                                                                                                                                                                                                                                                                                                        |
|---------------------------------|----------------------------------------------------------------------------------------------------------------------------------------------------------------------------------------------------------------------------------------------------------------------------------------------------------------------------------------------------------------------------------------|
| Journal:                        | <i>BMJ Open</i>                                                                                                                                                                                                                                                                                                                                                                        |
| Manuscript ID                   | bmjopen-2018-027767.R1                                                                                                                                                                                                                                                                                                                                                                 |
| Article Type:                   | Communication article                                                                                                                                                                                                                                                                                                                                                                  |
| Date Submitted by the Author:   | 10-Dec-2018                                                                                                                                                                                                                                                                                                                                                                            |
| Complete List of Authors:       | Leese, Henry; University of Hull, Hull York Medical School<br>Sathyapalan, Thozhukat; Hull Royal Infirmary, Diabetes and Endocrinology<br>Allgar, Victoria; York University, HYMS/Health Sciences<br>Brison, Daniel; Central Manchester University Hospitals NHS Foundation Trust, Department of Reproductive Medicine<br>Sturmey, Roger; University of Hull, Hull York Medical School |
| <b>Primary Subject Heading</b>: | Medical publishing and peer review                                                                                                                                                                                                                                                                                                                                                     |
| Secondary Subject Heading:      | Medical education and training, Research methods                                                                                                                                                                                                                                                                                                                                       |
| Keywords:                       | STATISTICS & RESEARCH METHODS, Data analysis and interpretation, Data distributions                                                                                                                                                                                                                                                                                                    |
|                                 |                                                                                                                                                                                                                                                                                                                                                                                        |

SCHOLARONE™  
Manuscripts

1  
2  
3 1 Going to extremes: the Goldilocks/Lagom principle and data distribution  
4

5 2 Henry J Leese <sup>1\*</sup>, Thozhukat Sathyapalan <sup>2,3</sup>, Victoria Allgar <sup>4</sup>, Daniel R Brison <sup>5,6</sup> & Roger G  
6 3 Sturmeay <sup>1</sup>  
7 4

8 5 1, Centre for Atherothrombosis and Metabolism, Hull York Medical School, University of Hull,  
9 6 Hull, HU6 7RX, UK

10 7 2, Academic Diabetes, Endocrinology and Metabolism, Hull York Medical School, University  
11 8 of Hull, Hull, HU6 7RK UK

12 9 3, Department of Endocrinology, Hull and East Yorkshire Hospitals NHS Trust, Hull, UK

13 10 4, Hull York Medical School, University of York, York YO10 5DD, UK

14 11 5, Maternal and Fetal Health Research Centre, Division of Developmental Biology and  
15 12 Medicine, School of Medical Sciences, Faculty of Biology, Medicine and Health, University of  
16 13 Manchester, Manchester Academic Health Sciences Centre, St. Mary's Hospital,  
17 14 Manchester, M13 9WL, United Kingdom

18 15 6, Department of Reproductive Medicine, St. Mary's Hospital, Manchester University NHS  
19 16 Foundation Trust, Manchester Academic Health Sciences Centre, Manchester, M13 9WL,  
20 17 United Kingdom

21 18 \* To whom correspondence should be addressed: [henry.leese@hyms.ac.uk](mailto:henry.leese@hyms.ac.uk)  
22 19  
23 20  
24 21  
25 22

26 27  
28 28  
29 29  
30 30  
31 31  
32 32 **Abstract**

33 23 Numerical data in biology and medicine are commonly presented as mean or median with  
34 24 error or confidence limits, to the exclusion of individual values. Analysis of our own and  
35 25 others' data indicates that this practice risks excluding 'Goldilocks' effects in which a  
36 26 biological variable has a range of expression between 'too much' and 'too little' with a region  
37 27 in between where its function is 'just right', or as termed in Sweden, 'Lagom', which  
38 28 symbolises 'moderation' and 'in balance. This was confirmed by a narrative search of the  
39 29 literature using the PubMed Database, which revealed numerous relationships of biological  
40 30 and clinical phenomena of the Goldilocks/Lagom form including quantitative and qualitative  
41 31 examples from the health and social sciences. Some possible mechanisms underlying these  
42 32 phenomena are considered. We conclude that retrospective analysis of existing data will  
43 33 most likely reveal a vast number of such distributions to the benefit of medical understanding  
44 34 and clinical care and that a transparent approach of presenting each value within a data set  
45 35 individually should be adopted to ensure a more complete evaluation of research studies in  
46 36 future.

47 37  
48 38 **174 words**  
49 39  
50 40  
51 41  
52 42

53 41 Going to extremes: the Goldilocks/Lagom principle and data distribution  
54 42

55 42 **Text**  
56 43  
57 44

58 44 Introduction  
59  
60

1  
2  
3 45 Numerical data in science and medicine have traditionally been presented as mean or  
4 46 median values with standard errors or standard deviations. Such data commonly take the  
5 47 form of tables, bar graphs or line graphs. However, as (1) point out, this practice poses a  
6 48 problem since different distributions of data can lead to the same bar or line graph. This was  
7 49 well illustrated recently by (2) who used illustrative data from a hypothetical experiment to  
8 50 examine the impact of three different cell lines on drug receptor activation and showed that a  
9 51 variety of distributions of individual data points can lead to similar bar graphs with the same  
10 52 mean (Fig 1).

11 53 The attention paid to individual variation in cellular and molecular biological and clinical  
12 54 studies is relatively recent, but has been well-known for many years to ecologists, especially  
13 55 following the publication by Albert F. Bennett, in 1987, of an influential article entitled: *Inter-*  
14 56 *individual variability: an underutilized resource*. Bennett, an ecological physiologist, pointed  
15 57 out that mean values with confidence intervals about the mean, once published tend to ‘--  
16 58 *take on a life of their own, and become the only point of analysis and comparison*’ to the  
17 59 exclusion of the individual values, and their potential significance. Bennett referred to this  
18 60 tendency as ‘*the tyranny of the Golden Mean*’, and as an alternative, advocated the analysis  
19 61 of inter-individual variability, i.e., the full range of individual values, he considered could  
20 62 provide the observer with a greater interpretative repertoire.

21 63 In the time since Bennett’s paper, there has been a movement away from the tyranny of the  
22 64 mean in many areas of biology, notably in ecology (3). Examples are provided by Stephen J  
23 65 Gould (4), who wrote an article on ‘*The median isn’t the message*’, Hayes and Jenkins (5) on  
24 66 individual variation in mammals, and Lloyd-Smith (6) on the spread of epidemics of human  
25 67 disease.

26 68  
27 69 Our interest in inter-individual variability arose particularly from research in which we have  
28 70 been involved on (a) the development and metabolism of single preimplantation mammalian  
29 71 embryos (DB, HL, RS) and (b) of glycaemic control in individual human subjects (TS).

#### 30 72 (a) Development and metabolism of single preimplantation embryos

31 73 Data which illustrate the value of distributions rather than mean or median values were  
32 74 provided by (7) who measured the consumption of the essential nutrient, pyruvate, by single  
33 75 bovine preimplantation embryos at the zygote stage (1-cell fertilised egg; day 1 of  
34 76 development). The experiments revealed considerable heterogeneity between individual  
35 77 embryos such that it was possible to divide them prospectively into 3 groups - of ‘high’,  
36 78 ‘intermediate’ and ‘low’ pyruvate consumption at an early stage (day 2) - and track their  
37 79 subsequent development to the blastocyst stage, a critical developmental endpoint. These

1  
2  
3 80 data indicated that intermediate values of pyruvate consumption correlated with viability  
4 81 (capacity to form a blastocyst), though with considerable overlap between the categories.  
5  
6 82 Put another way, which takes account of this overlap, plotting individual values revealed the  
7  
8 83 existence of an optimal 'range' of metabolic activity. This concept was developed in a follow-  
9  
10 84 up paper (8) in which we proposed that the optimal range was equivalent to a 'Goldilocks  
11 85 zone' or as it is known in Sweden, of 'lagom', meaning 'just the right amount', in which  
12  
13 86 embryos with maximum developmental potential are located (see a\*).

14 87

15  
16 88 (b) Glycaemic control

17 89

19 90 Plasma Haemoglobin A<sub>1c</sub> (HbA<sub>1c</sub>) is the standard measure of glucose control and is  
20 91 recommended for use as a diagnostic test for humans with diabetes mellitus (9). There is an  
21 92 association between the extent of high blood glucose as measured by HbA<sub>1c</sub> and the risk of  
22 93 death and of macrovascular and microvascular disease in patients with type 2 diabetes  
23 94 (T2DM) (10). In the landmark United Kingdom Prospective Diabetes Study, intensive  
24 95 glycaemic control aiming for a lower HbA<sub>1c</sub> of 7% was associated with improved outcome in  
25 96 newly diagnosed patients with type 2 diabetes (T2DM) (11). This finding was then  
26 97 extrapolated to all patients with T2DM, and as a result, low HbA<sub>1c</sub> levels were  
27 98 recommended for management of patients with T2DM. However, concerns arose as data  
28 99 from the Action to Control Cardiovascular Risk in Diabetes (ACCORD) trial began to emerge  
29 100 showing increased all-cause mortality and cardiovascular mortality in the intensive treatment  
30 101 group who were treated with antihyperglycaemic agents aiming for a lower HbA<sub>1c</sub> target of  
31 102 6% compared with conventional antihyperglycaemic treatment in patients with T2DM aiming  
32 103 for HbA<sub>1c</sub> of 7-7.9%. These results led to early termination of the trial (12). Further studies  
33 104 have demonstrated that both high and low levels of HbA<sub>1c</sub> are associated with an increased  
34 105 risk of all-cause mortality suggesting a "Goldilocks' or 'lagom" state in between.

35 106

36 107 Similar "U" shaped associations with HbA<sub>1c</sub> and all-cause mortality have also been shown  
37 108 for type 1 diabetes (13). Even in patients without diabetes, extremes of glycaemia as  
38 109 measured by HbA<sub>1c</sub> are associated with adverse clinical outcomes including cardiovascular  
39 110 events and all-cause mortality. Similar increases in mortality in either extremes are seen  
40 111 with body weight, blood pressure, birth weight, cholesterol and other cardiovascular risk  
41 112 factors.

42 113

43 114 Goldilocks and Lagom

44 115 The Goldilocks zone has been defined mathematically by (14) in the context of xenobiotic  
45 116 ligand binding to nuclear receptors as a '*Non-monotonic receptor-mediated dose-response*

1  
2  
3 117 *curve*' (NMDRC), and by (15) in the context of endocrine disrupting chemicals as 'a  
4 118 *response where the slope of the curve changes sign from positive to negative or vice versa*  
5 119 *somewhere along the range of doses examined*'. These are valuable definitions because  
6 120 they can be applied to all non-linear distributions including U-shaped, inverted U-shaped, J-  
7 121 shaped, sigmoidal and reverse sigmoidal.

11 122 The U-shaped curve is probably the most widely observed. It usually refers to the nonlinear  
12 123 relationship between two variables, in particular, a dependent and an independent variable.  
13 124 Because many analytical methods assume an underlying linear relationship, systematic  
14 125 deviation from linearity can lead to bias in estimation of safe levels in exposure to nutrients,  
15 126 drugs or toxic agents (for a discussion see section on *Mechanisms* below and (15)).  
16 127

#### 17 128 How widespread is the presence of a Goldilocks zone in biology and medicine?

18 129 We thought it might be instructive to discover how widely the notion of a 'Goldilocks zone' is  
19 130 a feature of the wider biological literature, especially as applied to medicine. A  
20 131 comprehensive search for information conducted on the *PubMed* database in early 2018  
21 132 using the term 'Goldilocks' revealed 184 entries, all of which have been examined, together  
22 133 with the grey literature. Only articles in English language were selected. A selection of 43 of  
23 134 these publications has been presented (Appendix 1) as representative of the range of  
24 135 phenomena which invoke the Goldilocks concept in order to increase biological and clinical  
25 136 understanding. It should be emphasised that this is a narrative review rather than systematic  
26 137 review and no judgement on the quality of these studies or of those which have been omitted  
27 138 is implied. Patient/public involvement: No members of the public, nor patients were involved  
28 139 in the synthesis of this manuscript.  
29 140

30 141 Inspection of these examples reveals the wide range of biological and clinical phenomena in  
31 142 which Goldilocks zones have been found including the health and social sciences which can  
32 143 be qualitative rather than quantitative. It seems likely that a vast number remain to be  
33 144 discovered and that authors could, in a relatively simple manner, derive added value from  
34 145 their existing data by presenting distributions rather than median/mean values, and making  
35 146 raw data available to the research community via online repositories. This would allow  
36 147 systematic re-analysis by data scientists with an interest in the Goldilocks/Lagom concept.  
37 148

#### 38 149 Mechanisms underlying the Goldilocks Principle and what is Lagom

39 150  
40 151  
41  
42  
43  
44  
45  
46  
47  
48  
49  
50  
51  
52  
53  
54  
55  
56  
57  
58  
59  
60

### 152 *Mechanisms which are global in scope*

153 We previously proposed an explanation that may account for Goldilocks/Lagom phenomena,  
154 derived from our work on energy efficiency in early mammalian embryo development (8)  
155 which made use of an account of general aspects of biological optimisation by (16). The  
156 premise was that living things aim to function with the minimum input of energy, i.e., with  
157 high energetic efficiency. To accomplish this will obviously require a threshold level of  
158 metabolic activity to ensure a given process proceeds physiologically, while the upper limit  
159 will be set by the capacity to increase metabolism vs '*the energy parsimony in almost*  
160 *everything (living things) do*' (16). The Goldilocks/Lagom zone will obviously lie between  
161 these extremes. The boundaries will be set by homeostatic mechanisms at all levels of  
162 organisation. Such boundaries will be flexible in order to allow for the capacity to up- or  
163 down-regulate metabolism in response to stress. Responses of these types have been  
164 usefully categorised by ecologists to distinguish (a) modest changes in metabolism (up or  
165 down within the *optimum* (Goldilocks/Lagom) range) from which the cell/organism can  
166 recover (the so-called *Pejus* range) and (b) extreme perturbation beyond the optimum which  
167 shifts metabolism irreversibly into a *Pessimum* range which is fatal (see Fig 2 in (17))

169 Some *specific mechanisms* for the production of non-monotonic receptor-mediated dose-  
170 response curves (NMDRCs) were well summarised by (15) in terms of the effect of  
171 endocrine disrupting chemicals, notably Bisphenol A on cells in culture, whole organisms,  
172 laboratory animals and human populations. Interestingly, it was reported that NMDRCs were  
173 common, comprising 20-30% of all studies examined, depending on the conditions; e.g., in  
174 vivo vs in vitro. Mechanisms considered included cytotoxicity (18), inhibition of cell  
175 proliferation (19); hormone receptors produced vs degraded (20); cell and tissue specific co-  
176 factors (21) and pharmacological effects. At the whole body level, examples of NMDRCs in  
177 nutrition are widespread, reflecting minimum requirements at the lower end of the distribution  
178 and toxicity at the higher, for example, vitamin A. Vandenberg (15) concludes that '*strong*  
179 *evidence for Non-monotonic receptor-mediated dose-response curves*' - - *question the*  
180 *current risk assessment practice where 'safe' levels are predicted from high dose exposures*'

### 183 *Conclusion*

185 There has long been a fixation in the biological and clinical research communities with  
186 presenting data solely as measures of dispersion (means and medians) and of central  
187 tendency (e.g., standard deviation and interquartile range). We believe that the retrospective



1  
2  
3 188 analysis of existing data could reveal numerous potential relationships with a  
4  
5 189 Goldilocks/Lagom pattern.

6 190 Interestingly, the editors of the British Journal of Pharmacology ' (2) '*will now require that,*  
7  
8 191 *where possible, numerical data (whether categorical or continuous), particularly involving*  
9  
10 192 *two sets or paired data, should be presented using scatter-plots, before-after graphs, and*  
11 193 *other forms in which each individual 'n' value is individually plotted, rather than using bar*  
12 194 *charts. Authors presenting data as bar charts should state that a scatter plot or before–after*  
13 195 *charts did not reveal unusual or interesting aspects of the data not obvious from the bar*  
14 196 *chart'*.

15  
16 197  
17  
18  
19 198 We believe the Journal should be complimented on this approach and urge all such journals  
20 199 to adopt it.

21  
22 200

23  
24 201 Author contributions:

25 202 H J Leese; conceived the study, conducted literature searches and wrote the first draft. All  
26 203 authors then commented on subsequent drafts. V Allgar; provided statistical advice, DR  
27 204 Brison; contributed to the initial concept and provided new material, as did RG Sturmey who  
28 205 also prepared the manuscript for submission T Sathyalapan; contributed to initial concept;  
29 206 provided new material and clinical expertise

30 207

31  
32 208 Competing Interests:

33  
34 209 The authors have no competing interests to declare in relation to this work.

35 210

36  
37 211 Funding:

38 212 No specific funding was awarded for this research.

39 213

40 214 **References**

41  
42 215

- 43  
44  
45 216 1. Weissgerber TL, Milic NM, Winham SJ, Garovic VD. Beyond Bar and Line Graphs:  
46 217 Time for a New Data Presentation Paradigm. PLoS Biol. 2015;13(4):1–10.  
47  
48 218 2. George CH, Stanford SC, Alexander S, Cirino G, Docherty JR, Giembycz MA, et al.  
49 219 Updating the guidelines for data transparency in the British Journal of Pharmacology -  
50 220 data sharing and the use of scatter plots instead of bar charts. Br J Pharmacol  
51 221 [Internet]. 2017 Sep 1 [cited 2018 Oct 4];174(17):2801–4. Available from:  
52 222 <http://doi.wiley.com/10.1111/bph.13925>  
53  
54 223 3. Roche DG, Careau V, Binning SA. Demystifying animal “personality” (or not): why  
55 224 individual variation matters to experimental biologists. J Exp Biol [Internet]. 2016 Dec  
56 225 15 [cited 2018 Oct 4];219(Pt 24):3832–43. Available from:



- 1  
2  
3 226 <http://www.ncbi.nlm.nih.gov/pubmed/27852750>
- 4  
5 227 4. Gould SJ. The Median Isn't the Message [Internet]. [cited 2018 Oct 4]. Available from:  
6 228 [https://people.umass.edu/biep540w/pdf/Stephen Jay Gould.pdf](https://people.umass.edu/biep540w/pdf/Stephen_Jay_Gould.pdf)
- 7  
8 229 5. Hayes JP, Jenkins SH. Individual Variation in Mammals. *J Mammal* [Internet]. 1997  
9 230 May 21 [cited 2018 Oct 4];78(2):274–93. Available from:  
10 231 <https://academic.oup.com/jmammal/article-lookup/doi/10.2307/1382882>
- 11  
12 232 6. Lloyd-Smith JO, Schreiber SJ, Kopp PE, Getz WM. Superspreading and the effect of  
13 233 individual variation on disease emergence. *Nature* [Internet]. 2005 Nov 17 [cited 2018  
14 234 Oct 4];438(7066):355–9. Available from: <http://www.nature.com/articles/nature04153>
- 15  
16 235 7. Guerif F, McKeegan P, Leese HJ, Sturmey RG. A Simple Approach for COntsumption  
17 236 and RElease (CORE) Analysis of Metabolic Activity in Single Mammalian Embryos.  
18 237 *PLoS One*. 2013;8(8).
- 19  
20 238 8. Leese HJ, Guerif F, Allgar V, Brison DR, Lundin K, Sturmey RG. Biological  
21 239 optimization, the Goldilocks principle, and how much is lagom in the preimplantation  
22 240 embryo. *Mol Reprod Dev*. 2016;83(9).
- 23  
24 241 9. American Diabetes Association AD. Diagnosis and classification of diabetes mellitus.  
25 242 *Diabetes Care* [Internet]. 2011 Jan 1 [cited 2018 Oct 4];34 Suppl 1(Supplement  
26 243 1):S62-9. Available from: <http://www.ncbi.nlm.nih.gov/pubmed/21193628>
- 27  
28 244 10. Khaw K-T, Wareham N. Glycated hemoglobin as a marker of cardiovascular risk. *Curr*  
29 245 *Opin Lipidol* [Internet]. 2006 Dec [cited 2018 Oct 4];17(6):637–43. Available from:  
30 246 <https://insights.ovid.com/crossref?an=00041433-200612000-00006>
- 31  
32 247 11. Intensive blood-glucose control with sulphonylureas or insulin compared with  
33 248 conventional treatment and risk of complications in patients with type 2 diabetes  
34 249 (UKPDS 33). *Lancet* [Internet]. 1998 Sep 12 [cited 2018 Oct 4];352(9131):837–53.  
35 250 Available from:  
36 251 <https://www.sciencedirect.com/science/article/pii/S0140673698070196?via%3Dihub>
- 37  
38 252 12. Duckworth W, Abraira C, Moritz T, Reda D, Emanuele N, Reaven PD, et al. Glucose  
39 253 Control and Vascular Complications in Veterans with Type 2 Diabetes. *N Engl J Med*  
40 254 [Internet]. 2009 Jan 8 [cited 2018 Oct 4];360(2):129–39. Available from:  
41 255 <http://www.nejm.org/doi/abs/10.1056/NEJMoa0808431>
- 42  
43 256 13. Schoenaker DAJM, Simon D, Chaturvedi N, Fuller JH, Soedamah-Muthu SS.  
44 257 Glycemic Control and All-Cause Mortality Risk in Type 1 Diabetes Patients: The  
45 258 EURODIAB Prospective Complications Study. *J Clin Endocrinol Metab* [Internet].  
46 259 2014 Mar 1 [cited 2018 Oct 4];99(3):800–7. Available from:  
47 260 <https://academic.oup.com/jcem/article-lookup/doi/10.1210/jc.2013-2824>
- 48  
49 261 14. Kohn MC, Melnick RL. Biochemical origins of the non-monotonic receptor-mediated  
50 262 dose-response [Internet]. Vol. 29, *Journal of Molecular Endocrinology*. 2002 [cited

- 1  
2  
3 263 2018 Oct 4]. Available from: <http://www.endocrinology.org>  
4  
5 264 15. Vandenberg LN. Non-monotonic dose responses in studies of endocrine disrupting  
6 265 chemicals: bisphenol a as a case study. *Dose Response* [Internet]. 2014 May [cited  
7 266 2018 Oct 4];12(2):259–76. Available from:  
8 267 <http://www.ncbi.nlm.nih.gov/pubmed/24910584>  
9  
10 268 16. Johnson AT. Teaching the principle of biological optimization. *J Biol Eng* [Internet].  
11 269 2013 Feb 20 [cited 2018 Oct 4];7(1):6. Available from:  
12 270 <http://jbioleng.biomedcentral.com/articles/10.1186/1754-1611-7-6>  
13  
14 271 17. Sokolova IM. Energy-Limited Tolerance to Stress as a Conceptual Framework to  
15 272 Integrate the Effects of Multiple Stressors. *Integr Comp Biol* [Internet]. 2013 Oct 1  
16 273 [cited 2018 Oct 4];53(4):597–608. Available from:  
17 274 <https://academic.oup.com/icb/article-lookup/doi/10.1093/icb/ict028>  
18  
19 275 18. Welshons W V, Thayer KA, Judy BM, Taylor JA, Curran EM, Vom Saal FS. Large  
20 276 Effects from Small Exposures. I. Mechanisms for Endocrine-Disrupting Chemicals  
21 277 with Estrogenic Activity. 2003 [cited 2018 Oct 8];111. Available from: <http://dx.doi.org/>  
22 278 19. SOTO AM, SONNENSCHNEIN C, PRECHTL N, WEILL B, OLEA N. Methods to  
23 279 Screen Estrogen-Agonists and Antagonists. *J Med Food* [Internet]. 1999 Jan [cited  
24 280 2018 Oct 8];2(3–4):139–42. Available from:  
25 281 <http://www.liebertpub.com/doi/10.1089/jmf.1999.2.139>  
26  
27 282 20. Ismail A, Nawaz Z. Nuclear hormone receptor degradation and gene transcription: An  
28 283 update. *IUBMB Life* (International Union Biochem Mol Biol Life) [Internet]. 2005 Jul 1  
29 284 [cited 2018 Oct 8];57(7):483–90. Available from:  
30 285 <http://doi.wiley.com/10.1080/15216540500147163>  
31  
32 286 21. Jeyakumar M, Webb P, Baxter JD, Scanlan TS, Katzenellenbogen JA. Quantification  
33 287 of Ligand-Regulated Nuclear Receptor Corepressor and Coactivator Binding, Key  
34 288 Interactions Determining Ligand Potency and Efficacy for Thyroid Hormone Receptor.  
35 289 *Biochemistry* [Internet]. 2008 [cited 2018 Oct 8];47(28):7465–76. Available from:  
36 290 <https://www.ncbi.nlm.nih.gov/pmc/articles/PMC2574600/pdf/nihms57470.pdf>  
37  
38 291  
39 292  
40  
41 293  
42  
43 294  
44  
45  
46  
47  
48  
49  
50  
51  
52  
53  
54  
55  
56  
57  
58  
59  
60

1  
2  
3 295 Fig 1; An illustrative example of a comparison of cell lines is described in Figure 1, which  
4 296 shows that bar charts do not give the reader adequate information on the variability and  
5 297 distribution of each sampled 'n'. This is because bar charts frequently do not adequately  
6 298 convey major features of the dataset. As explained below, Figure 1 illustrates why moving  
7 299 away from using bar charts to visualize the entire dataset is a necessary refinement that can  
8 300 increase the transparency and reporting of data.

13 301 “ The extent of activation of a receptor in three cell lines a, b and c under baseline  
14 302 (drug-naïve) conditions and following the addition of a drug is given in arbitrary units. The  
15 303 same data sets are presented in three different ways: (A) bar chart, (B) grouped column  
16 304 scatter plot with means and error and (C) before–after scatter plot.  $n = 10$  (i.e. biological  
17 305 replicates and not technical replicates). In this example, error bars represent the SEM  
18 306 although authors should consider the sampling size and distribution of 'n' when choosing the  
19 307 most appropriate way of showing experimental error [e.g. SD or confidence interval]”.

24 308

27 309

30 310

32 311

34 312

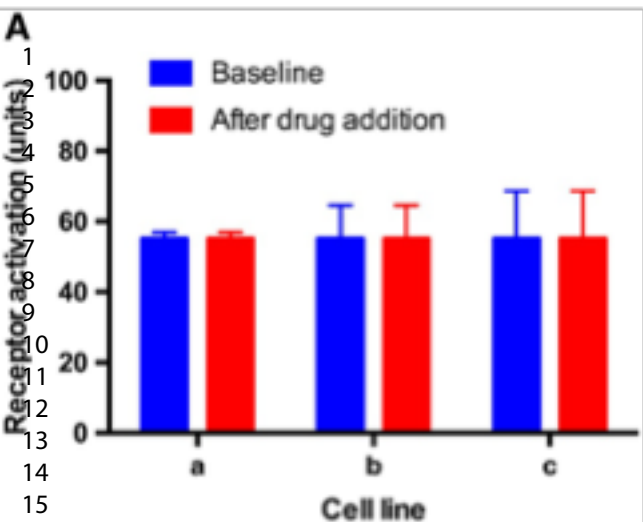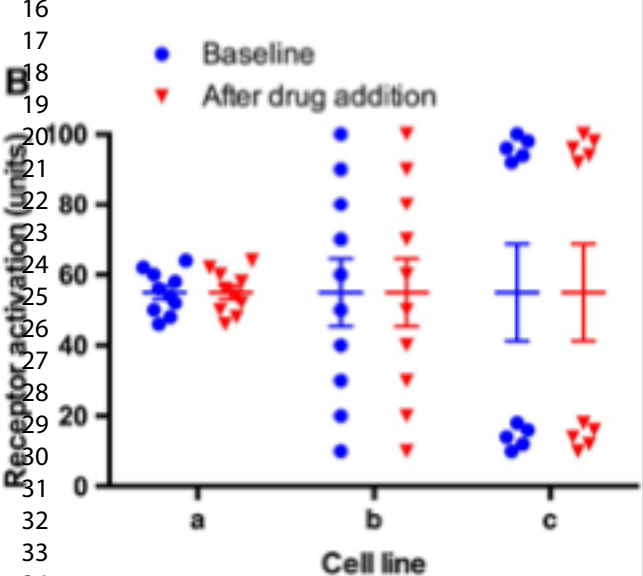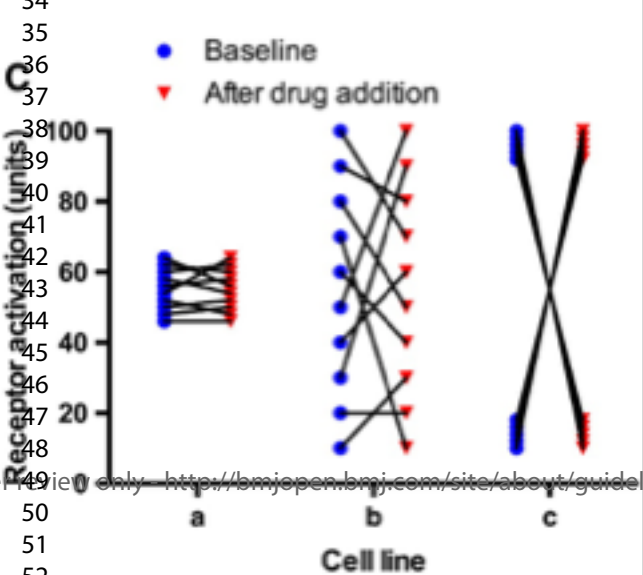

## Appendix 1

*Cell/molecular biological Goldilocks zones*

- The level of the signal molecule mTOR which ensures proper functioning of the anti-tumour agent *Treg* in immune cells: Zeng (2017) –
- Appropriate proximity to the ‘niche’ environment in the crypt region of the colon in order to ensure the persistence of stem cell potential: Walther and Graham (2014)
- The need for microbial communities to be neither too distant nor too close for high levels of emergent biosynthetic capacity to occur (Chiu et al 2014)
- The need to maintain a balance in the expression, activation and repression of Pattern Recognition Receptors in order to promote immune system homeostasis in the GI tract: (Ringel-Scala et al 2016)
- An appropriate balance of the highly gene-dosage-sensitive Notch pathway, a fundamental signalling mechanism required for differentiation and tissue homeostasis; too much or too little can lead to disease. (Braune and Lendahl 2016)
- ‘Goldilocks’, is the name applied to the Python computer package which takes a census of gene sequence data to identify genomic regions which are ‘just right’ (Nicholls et al, 2013)
- Mechanoresponsive proteins have Goldilocks zones of actin binding affinity in order to carry out cytoskeleton reorganisation in response to changing mechanical environments. (Schiffhauer et al 2015)
- Understanding *Mycobacterium tuberculosis* infection requires information on the balance of key chemokines/cytokines and their receptors and how loss of that balance can promote disease (Domingo-Gonzalez et al 2016).
- The ideal ‘Goldilocks’ Chemistry allows DNA and RNA to carry out their fundamental function in molecular heredity (Houlihan et al 2017)
- An allosteric Serine- Arginine protein -phosphatase platform which balances phosphorylation levels in a ‘goldilocks region’ is required for the proper sub-nuclear stage of a protein kinase protein splicing factor (Aubot et al 2017)
- Methyl-CpG-binding protein (MeCP2) must stay within a narrow range of expression – not too much, not too little – to be functionally ‘just right’ for proper epigenetic regulation in order to limit devastating phenotypic outcomes (immune defects underlying neurological deficits) (Boothby and Williams, 2012)
- Undifferentiated Embryonic Cell Transcription Factor (Utf1) ensures that conditions are precisely right for maintaining pluripotency and self-renewal in embryonic stem cells (Laskowski and Knoepfler 2012)

*Tissue/whole body biology applied in medicine Goldilocks zones*

- To minimise the risk of bone fractures, vitamin D levels need to be between 'lower' and 'higher', both of which increase the risk (Baughman and Lower 2014)
- A high and low proportion of carbohydrate in the diet is associated with increased human mortality, with minimal risk at 50-55% carbohydrate intake (Seidelmann et al 2018)
- Appropriate redox balance in striated muscle, where ROS production is counterbalanced by antioxidant capacity requires a Goldilocks zone, which scales down from the whole tissue to mitochondrial level: Alleman et al 2014)
- Optimal development of advanced therapeutic medicinal products for bone repair need to be neither too simple nor too complex (Leijten et al 2015)
- Appropriate timing, dose and regimen of estrogen exposure is required to promote beneficial effects on cognition (Koenle and Bimonte-Nelson, 2015)
- Vitamin C concentrations which are 'just right' (especially not unphysiologically high) are needed in order to interpret effects of the vitamin on human physiology (Padayatty and Levine, 2016)
- Recommendations for post-polypectomy surveillance should aim to target a Goldilocks zone (Ladabaum and Schoen, 2016)
- The need to balance fetal needs vs maternal supply during pregnancy in great apes and humans in terms of the level of inflammation; is essential during implantation; otherwise there is the risk of disorders such as gestational diabetes and choriodecidual inflammatory syndrome (Clancy, 2013).
- With regard to fluid management around the time of surgery – too little (pre- and post- operatively) is associated with inadequate organ perfusion and too much, with tissue oedema and surgical complications. Finding the 'Goldilocksian' 'just right' zone is the challenge (Cuthbertson, 2013).
- Judicious surgery for breast cancer indicates that a 2mm margin is superior to a narrower one in patients with Ductal Carcinoma In Situ and that bigger is not necessarily better (Jagsi 2016)
- Networks of neurones need to stay in a Goldilocks zone between 'too quiet' and 'too active' (Humphries 2016).
- The 'Goldilocks zone' of fatty acid metabolism is required to ensure that the relationship with cardiac function is just right. (Kerr et al 2017).

- 1
- 2
- 3
- 4
- 5
- 6
- 7
- 8
- 9
- 10
- 11
- 12
- 13
- 14
- 15
- 16
- 17
- 18
- 19
- 20
- 21
- 22
- 23
- 24
- 25
- 26
- 27
- 28
- 29
- 30
- 31
- 32
- 33
- 34
- 35
- 36
- 37
- 38
- 39
- 40
- 41
- 42
- 43
- 44
- 45
- 46
- 47
- 48
- 49
- 50
- 51
- 52
- 53
- 54
- 55
- 56
- 57
- 58
- 59
- 60
- In emergency medicine a balance needs to be struck between the speed of treatment and its accuracy – sicker patients are more likely to benefit from intervention whereas less sick do not and may be harmed. It is necessary to get into the *Goldilocks zone*; the ‘just right’ balance between speed and accuracy (Fatovich, 2017)
- In the use of exercise to maintain joint homeostasis in the horse, too little or too much can result in joint derangement whereas just the right amount will provide optimal functioning of the joint (Milner 2017).
- In the treatment of perioperative blood pressure, the anaesthetist should aim at the ‘Goldilocks’ range, reminiscent of the optimal haemoglobin concentration, and avoid excursions in either direction (Sweitzer and Howell, 2017)
- ‘Goldilocks’ software is used in facilitating hearing-aid self-fitting *to allow user exploration and selection of preferred levels of overall output, low-frequency cut and high frequency boost*. (Boothroyd et al 2017).
- In the administration of oxygen in the clinical situation, the move is to avoid both excessive and inadequate therapy – moving away from the notion that more is always better and instead giving the least amount necessary (Martin and Grocott 2017).
- A ‘Goldilocks trial design’ constantly asks *‘Is the sample size too big, too small or just right?’* As an example, Broglio et al (2014) present a Bayesian adaptive design for a confirmatory trial to select a trial’s sample size based on accumulating data
- The Goldilocks dilemma in acute ischemic stroke asks which patients are ‘just right’ for endovascular treatments (Tansy and Liebeskind 2013)
- Excess or deficiency of retinoic acid leads to inner ear dysmorphogenesis via an effect on FGF3/1`1`2121FGF10 signalling; referred to as a Goldilocks phenomenon (Frenz et al 2010)
- For patients with newly diagnosed glioblastoma, the goal is to define the ‘Goldilocks zone’ for the optimal duration of adjuvant temozolomide (Grossman and Keleinberg 2017)
- Following lung injury, different progenitor cell populations can arise depending on the molecular environment – resulting in normal or aberrant alveolar repair. A key question is how to maintain a ‘Goldilocks zone’ of repair (Dean and Lloyd 2017) – nice diagram
- The design of inferior vena cava filters for the treatment of Venous thromboembolic disease relies on a ‘Goldilocks’ premise: i.e., make the device stable, (so it doesn’t migrate) but not too stable (so you can still retrieve it) (Magnowski et al 2017)



- Genetic variation in humans occurs through different types of alleles; at one extreme are mutations that cause Mendelian disease such as familial hypercholesterolemia arising from mutations in the LDL receptor with powerful phenotypic effects; at the other are common alleles (eg. ApoE) with small phenotypic effects. In the middle are 'Goldilocks alleles' (e.g., PCSK9) where the mutations are common enough to be useful in epidemiological analyses (in contrast to Mendelian) but still produce detectable biochemical effects. (Cohen, 2013)
- Fetal androgen production, especially testosterone, needs to be 'just right' to ensure the appropriate developmental trajectory of the fetus and offspring, while inappropriate fetal androgen or androgen signalling – both too little and too much - is associated with disorders of male reproductive development as well as being implicated in Polycystic Ovarian Syndrome in women (Fowler and O'Shaughnessy 2013).

#### *Human Behaviour Goldilocks zones*

- Social auditory stimuli intermediate between 'predictable' and 'complex' best serve the selective attention of 7-8-month old infants: Kidd et al (2016)
- An optimal amount of social interactivity of television watching promotes children's visual attention and word learning (Nussenbaum and Amso, 2016).
- When considering the wellbeing of adolescents, 'too little' digital screen use may deprive them of important social information and peer pursuits whereas 'too much' may displace other meaningful activities (Przybylski and Weinstein 2017)

#### *Human educational training needs Goldilocks zones*

- The degree of specialisation required to ensure the acquisition of professional competences in Paediatric Psychological training (Steele et al 2014)

#### *Healthcare*

- The 'Goldilocks point' in Palliative Care refers to exactly the right time to mobilise specialist hospital/palliative care services for the patient sub-group who will derive the most benefit. (LeBlanc et al 2014)
- The Goldilocks Principle is invoked in the regulation of healthcare to make sure it is not too little, nor too much but 'just right': Kemple (2016)

- The need for Children's Health Insurance to provide 'just the right health outcomes, just the right patient care experience and just the right costs': Szilagyi (2015)

Zeng H. (2017) mTOR signalling in immune cells and its implications for cancer immunotherapy. *Cancer Letters*; 408: 182-189

Walther V, Graham TA (2014) Location, location, location! The reality of life for an intestinal stem cell in the crypt. *J Pathol*; 234: 1-4.

Chiu H-C, Levy R, Borenstein E (2014). Emergent biosynthetic capacity in simple microbial communities. *PLOS Computational Biology*; 10: e1003695

Ringel-Scala VM, McDaniel DK, Allen IC (2016) The Goldilocks Conundrum: NLR inflammasome modulation of gastrointestinal inflammation during inflammatory bowel disease. *Crit Rev Immunol*; 36: 283-314

Braune EB, Lendahl U (2016) Notch- a goldilocks signalling pathway in disease and cancer therapy. *Discov Med*; 115: 189-196

Nicholls SM, Clare A and Randall JC (2013) Goldilocks: a tool for identifying regions that are 'just right'. *Bioinformatics*; 32: 2047-2049

Schiffhauer ES, Luo T, Mohan K, Srivastava V, Qian X, Griffis, ER Iglesias PA, Robinson DN (2016) Mechanoaccumulative elements of the mammalian actin cytoskeleton. *Curr Biol*; 26: 1473-1479.

Domingo-Gonzalez R, Prince O, Cooper A, Khader SA (2016) Cytokines and chemokines in Mycobacterium tuberculosis infection. *Microbiol Spectr*; 4 doi 10.1128/microbiolospec.TB2-0018-2016.

Houlihan G, Arangundy-Franklin S, Holliger P (2017). Exploring the chemistry of genetic information storage and propagation through polymerase engineering. *Acc Chem Res*; 50: 1079-1087

Aubot BE, Hailye KL, Fattet L, Jennings PA, Adams JA (2017) Redirecting SR protein nuclear trafficking through an allosteric platform. *J Mol Biol*; 429: 2178-2191

Boothby M, Williams GL (2012) The Goldilocks effect. *Sci Transl Med*; 4:163fs42

Laskowski AI Knoepfler PS (2012) Utf1:Goldilocks for ES Bivalency. *Cell Stem Cell* 7:732-734

1  
2  
3 Baughman RP, Lower EE (2014) Goldilocks, vitamin D and sarcoidosis. *Arthritis Res Ther*  
4 16: 111-113  
5

6  
7  
8 Seidelmann SB, Claggett B, Cheng S, Henglin M, Shah A, Steffen LM, Folsom AR, Rimm  
9 EB, Willett Wc, Solomon SD (2018) Dietary carbohydrate intake and mortality: a prospective  
10 cohort study and meta-analysis. *The Lancet on line* August 16 2018  
11  
12 <http://cix.doi.org/10.1016/S2468-2667> (18)30135-X  
13

14  
15  
16 Alleman RJ, Katunge LA, Nelson MAM, Brown DA, Anderson EJ (2014). The 'Goldilocks  
17 Zone' from a redox perspective – Adaptive vs. deleterious responses to oxidative stress in  
18 striated muscle. *Frontiers in Physiology*; 5: 1-20.  
19

20  
21  
22 Leijten J, Chair YC, Papantoniou I, Gens L, Schrooten J, Luyten FP (2015). Cell-based  
23 advanced therapeutic medicinal products for bone repair: Keep it simple? *Advanced Drug*  
24 *Delivery Reviews* 84: 30-44  
25  
26

27  
28  
29  
30 Koebele SV, Bimonte-Nelson HA (2015). Trajectories and phenotypes with estrogen  
31 exposures across the lifespan: What does Goldilocks have to do with it? *Horm Behav* 74:  
32 86-104  
33  
34

35  
36 Padayatty SJ, Levine M (2016). Vitamin C physiology: the known and the unknown  
37 Goldilocks. *Oral Dis* 22: 463-493  
38  
39

40  
41 Ladabaum U, Schoen RE (2016) Post-polypectomy surveillance that would please Goldilocks  
42 – not too much, not too little, but just right. *Gastroenterology*; 150: 791-796.  
43  
44

45  
46 Clancy KBH (2007) Inflammation, Reproduction, and the Goldilocks Principle. In KBH  
47 Clancy, K Hinde, K and JN Rutherford: *Building babies: primate development in proximate*  
48 *and ultimate perspective. Developments in Primatology* 37, DOI 10.1007/978-1-4614-4060\_1  
49 Springer Science+Business Media New York, p4614-4060.  
50  
51

52  
53 Cuthbertson BH (2013) Goldilocks, elephants and surgical fluids. *Br J Anaesth*;110, 144–  
54 145, <https://doi.org/10.1093/bja/> ...  
55  
56

57  
58 Jaggi R (2016) Goldilocks and margins for DCIS: identifying 'just right'. *Practical radiation*  
59 *oncology* 6: 296-297.  
60

1  
2  
3  
4  
5 Humphries MD (2016) The Goldilocks zone in neural circuits. *eLife* 5: e22735  
6

7  
8 Kerr M, Dodd MS, Heather LC (2017) the 'Goldilocks zone' of fatty acid metabolism; to  
9 ensure that the relationship with cardiac function is just right. *Clin Sci* 131: 2079-2094.  
10  
11

12 Fatovich DM (2017). The time paradox of emergency medicine: another inverted U curve.  
13 *Emerg Med Australas* 29: 730-732.  
14  
15

16  
17 Milner PI (2017) Keeping joints healthy: The Goldilocks effect of exercise. *Veterinary Journal*  
18 226: 4-5.  
19  
20

21  
22 Sweitzer BJ, Howell SJ (2017) The Goldilocks principle as it applies to perioperative blood  
23 pressure: what is too high, too low, or just right? *Br J Anaesth* 119: 7-10  
24  
25

26  
27 Boothroyd A, Mackersie C (2017) A 'Goldilocks' approach to hearing-aid self-fitting: user  
28 interactions. *Am J Audiol*; 26: 430-435  
29  
30

31  
32 Martin D, Grocott M (2017) Oxygen therapy and the Goldilocks principle. *J Intensive Care*  
33 *Soc* 18: 279-281  
34  
35

36  
37 Broglio KR, Connor JT, Berry SM (2014) Not too big, not too small: a goldilocks approach to  
38 sample size selection 24: 685-705  
39  
40

41  
42 Tansy AP, Liebeskind DS (2013). The goldilocks dilemma in acute ischemic stroke. *Front*  
43 *Neurol* 4: 164-166.  
44  
45

46  
47 Frenz DA, Liu W, Cveki A, Xie Q, Wassef L, Loredana Q, Niederreither K, Maconochie, M  
48 Shanske A (2010) Retinoid signalling in inner ear development: a 'Goldilocks' phenomenon.  
49 *Am J Med Genet A* 152A: 2947-2961  
50  
51

52  
53 Grossman SA, Kleinberg L (2017) A search for the 'Goldilocks zone' with regard to the  
54 optimal duration of adjuvant temozolomide in patients with glioblastoma. *Neuro-Oncology*  
55 19: 1019-1020  
56  
57

58  
59 Dean CH, Lloyd CM (2017) Lung alveolar repair: not all cells are equal. *Trends Mol Med* 23:  
60 871-873.

1  
2  
3  
4  
5 Magnowski A, Brown M, Schramm K, Lindquist J, Rochun PJ, Johnson T (2017). The law of  
6 unintended consequences: current design challenges in inferior vena cava filters; *Expert*  
7 *Rev Med Devices* 14: 805-810  
8  
9

10  
11 Cohen JC (2013) Emerging LDL therapies: using human genetics to discover new  
12 therapeutic targets for plasmas lipids. *J Clin Lipidol* 7: S1-S5  
13  
14

15  
16 Fowler PA, O'Shaughnessy PJ (2013). The Goldilocks principle and developmental  
17 androgens in males; what is "just right"? *Endocrinology* 154: 1663-1671.  
18  
19

20  
21 Kidd C, Piantadosi ST, Aslin RN (2014) The Goldilocks effect in infant auditory attention.  
22 *Child Dev* 85: 1795-1804  
23  
24

25  
26 Nussenbaum K, Amso D (2016) An attentional Goldilocks effect: an optimal amount of social  
27 interactivity promotes word learning from video. *J Cogn Dev* 17: 30-40.  
28  
29

30  
31 Przybylski A, Weinstein N (2017) A large-scale test of the Goldilocks hypothesis: quantifying  
32 the relations between digital-screen use and the mental well-being of adolescents. *Psychol*  
33 *Sci* 28: 204-215  
34  
35

36  
37 Steele RG, Borner KB, Roberts MC (2014) Commentary: finding the middle bowl: Goldilocks'  
38 lessons on professional competences in pediatric psychology' *J Pediat Psychol* 39: 988-997  
39  
40

41  
42 LeBlanc TW, Currow DC, Abernethy AP (2014) On Goldilocks, care coordination, and  
43 palliative care: making it 'just right'. *Prim Care Respir J* 23: 8-10  
44

45  
46 Kemple T (2016) The Goldilocks problems in regulation. *BMJ* 2016; 354:i3778  
47

48  
49 Szilagyi PG (2015) The children's' health insurance program and the Goldilocks effect.  
50 *Acad Pediatr* 15: S13-S14  
51  
52  
53  
54  
55  
56  
57  
58  
59  
60

# BMJ Open

## Going to extremes: the Goldilocks/Lagom principle and data distribution

|                                 |                                                                                                                                                                                                                                                                                                                                                                                        |
|---------------------------------|----------------------------------------------------------------------------------------------------------------------------------------------------------------------------------------------------------------------------------------------------------------------------------------------------------------------------------------------------------------------------------------|
| Journal:                        | <i>BMJ Open</i>                                                                                                                                                                                                                                                                                                                                                                        |
| Manuscript ID                   | bmjopen-2018-027767.R2                                                                                                                                                                                                                                                                                                                                                                 |
| Article Type:                   | Communication                                                                                                                                                                                                                                                                                                                                                                          |
| Date Submitted by the Author:   | 20-Aug-2019                                                                                                                                                                                                                                                                                                                                                                            |
| Complete List of Authors:       | Leese, Henry; University of Hull, Hull York Medical School<br>Sathyapalan, Thozhukat; Hull Royal Infirmary, Diabetes and Endocrinology<br>Allgar, Victoria; York University, HYMS/Health Sciences<br>Brison, Daniel; Central Manchester University Hospitals NHS Foundation Trust, Department of Reproductive Medicine<br>Sturmey, Roger; University of Hull, Hull York Medical School |
| <b>Primary Subject Heading</b>: | Medical publishing and peer review                                                                                                                                                                                                                                                                                                                                                     |
| Secondary Subject Heading:      | Medical education and training, Research methods                                                                                                                                                                                                                                                                                                                                       |
| Keywords:                       | STATISTICS & RESEARCH METHODS, Data analysis and interpretation, Data distributions                                                                                                                                                                                                                                                                                                    |
|                                 |                                                                                                                                                                                                                                                                                                                                                                                        |

SCHOLARONE™  
Manuscripts

1  
2  
3 1 Going to extremes: the Goldilocks/Lagom principle and data distribution  
4

5 2 Henry J Leese <sup>1\*</sup>, Thozhukat Sathyapalan <sup>2,3</sup>, Victoria Allgar <sup>4</sup>, Daniel R Brison <sup>5,6</sup> & Roger G  
6 3 Sturmeay <sup>1</sup>  
7 4

8 5 1, Centre for Atherothrombosis and Metabolism, Hull York Medical School, University of Hull,  
9 6 Hull, HU6 7RX, UK

10 7 2, Academic Diabetes, Endocrinology and Metabolism, Hull York Medical School, University  
11 8 of Hull, Hull, HU6 7RK UK

12 9 3, Department of Endocrinology, Hull and East Yorkshire Hospitals NHS Trust, Hull, UK

13 10 4, Hull York Medical School, University of York, York YO10 5DD, UK

14 11 5, Maternal and Fetal Health Research Centre, Division of Developmental Biology and  
15 12 Medicine, School of Medical Sciences, Faculty of Biology, Medicine and Health, University of  
16 13 Manchester, Manchester Academic Health Sciences Centre, St. Mary's Hospital,  
17 14 Manchester, M13 9WL, United Kingdom

18 15 6, Department of Reproductive Medicine, St. Mary's Hospital, Manchester University NHS  
19 16 Foundation Trust, Manchester Academic Health Sciences Centre, Manchester, M13 9WL,  
20 17 United Kingdom

21 18 \* To whom correspondence should be addressed: [henry.leese@hyms.ac.uk](mailto:henry.leese@hyms.ac.uk)  
22 19  
23 20  
24 21  
25 22

26 27  
28 28  
29 29  
30 30  
31 31  
32 32 **Abstract**

33 23 Numerical data in biology and medicine are commonly presented as mean or median with  
34 24 error or confidence limits, to the exclusion of individual values. Analysis of our own and  
35 25 others' data indicates that this practice risks excluding 'Goldilocks' effects in which a  
36 26 biological variable falls within a range between 'too much' and 'too little' with a region  
37 27 between where its function is 'just right'; a concept captured by the Swedish term 'Lagom'.  
38 28 This was confirmed by a narrative search of the literature using the PubMed Database,  
39 29 which revealed numerous relationships of biological and clinical phenomena of the  
40 30 Goldilocks/Lagom form including quantitative and qualitative examples from the health and  
41 31 social sciences. Some possible mechanisms underlying these phenomena are considered.  
42 32 We conclude that retrospective analysis of existing data will most likely reveal a vast number  
43 33 of such distributions to the benefit of medical understanding and clinical care and that a  
44 34 transparent approach of presenting each value within a data set individually should be  
45 35 adopted to ensure a more complete evaluation of research studies in future.

46 36 **174 words**  
47 37  
48 38  
49 39  
50 40  
51 40

52 40 Going to extremes: the Goldilocks/Lagom principle and data distribution  
53

54 41 **Text**  
55 42  
56

57 43 Introduction  
58  
59  
60



1  
2  
3 44 Numerical data in science and medicine have traditionally been presented as mean or  
4 45 median values with standard errors or standard deviations. Such data commonly take the  
5 46 form of tables, bar graphs or line graphs. However, as (1) point out, this practice poses a  
6 47 problem since different distributions of data can lead to the same bar or line graph. This was  
7 48 well illustrated recently by (2) who used illustrative data from a hypothetical experiment to  
8 49 examine the impact of three different cell lines on drug receptor activation and showed that a  
9 50 variety of distributions of individual data points can lead to similar bar graphs with the same  
10 51 mean (Fig 1). This is because bar charts frequently do not convey major features of the  
11 52 dataset adequately. As Figure 1 makes clear, away from using bar charts to visualize the  
12 53 entire dataset is a necessary refinement that can increase the transparency and reporting of  
13 54 data.

14 55 “ The extent of activation of a receptor in three cell lines a, b and c under baseline  
15 56 (drug-naïve) conditions and following the addition of a drug is given in arbitrary units. The  
16 57 same data sets are presented in three different ways: (A) bar chart, (B) grouped column  
17 58 scatter plot with means and error and (C) before–after scatter plot.  $n = 10$  (i.e. biological  
18 59 replicates and not technical replicates). In this example, error bars represent the SEM  
19 60 although authors should consider the sampling size and distribution of ‘ $n$ ’ when choosing the  
20 61 most appropriate way of showing experimental error [e.g. SD or confidence interval]”.

21 62  
22 63 The attention paid to individual variation in cellular and molecular biological and clinical  
23 64 studies is relatively recent, but has been well-known for many years to ecologists, especially  
24 65 following the publication by Albert F. Bennett, in 1987, of an influential article entitled: *Inter-*  
25 66 *individual variability: an underutilized resource*. Bennett, an ecological physiologist, pointed  
26 67 out that mean values with confidence intervals about the mean, once published tend to ‘--  
27 68 *take on a life of their own, and become the only point of analysis and comparison*’ to the  
28 69 exclusion of the individual values, and their potential significance. Bennett referred to this  
29 70 tendency as ‘*the tyranny of the Golden Mean*’, and as an alternative, advocated the analysis  
30 71 of inter-individual variability, i.e., the full range of individual values, he considered could  
31 72 provide the observer with a greater interpretative repertoire.

32 73 In the time since Bennett’s paper, there has been a movement away from the tyranny of the  
33 74 mean in many areas of biology, notably in ecology (3). Examples are provided by Stephen J  
34 75 Gould (4), who wrote an article on ‘*The median isn’t the message*’, Hayes and Jenkins (5) on  
35 76 individual variation in mammals, and Lloyd-Smith (6) on the spread of epidemics of human  
36 77 disease.

37 78

1  
2  
3 79 Our interest in inter-individual variability arose particularly from research in which we have  
4 80 been involved on (a) the development and metabolism of single preimplantation mammalian  
5 81 embryos (DB, HL, RS) and (b) of glycaemic control in individual human subjects (TS).

8 82 (a) Development and metabolism of single preimplantation embryos

10 83 Data which illustrate the value of distributions rather than mean or median values were  
11 84 provided by (7) who measured the consumption of the essential nutrient, pyruvate, by single  
12 85 bovine preimplantation embryos at the zygote stage (1-cell fertilised egg; day 1 of  
13 86 development). The experiments revealed considerable heterogeneity between individual  
14 87 embryos such that it was possible to divide them prospectively into 3 groups - of 'high',  
15 88 'intermediate' and 'low' pyruvate consumption at an early stage (day 2) - and track their  
16 89 subsequent development to the blastocyst stage, a critical developmental endpoint. These  
17 90 data indicated that intermediate values of pyruvate consumption correlated with viability  
18 91 (capacity to form a blastocyst), though with considerable overlap between the categories.  
19 92 Put another way, which takes account of this overlap, plotting individual values revealed the  
20 93 existence of an optimal 'range' of metabolic activity. This concept was developed in a follow-  
21 94 up paper (8) in which we proposed that the optimal range was equivalent to a 'Goldilocks  
22 95 zone' or as it is known in Sweden, of 'lagom', meaning 'just the right amount', in which  
23 96 embryos with maximum developmental potential are located.

24 97  
25 98 (b) Glycaemic control

26 99  
27 100 Glycated haemoglobin (HbA<sub>1c</sub>) is a marker of glycaemic control in patients with diabetes  
28 101 which is commonly used in clinical practice. Indeed, (HbA<sub>1c</sub>) is the recommended test for  
29 102 diagnosing diabetes. (9). There is an association between the extent of high blood glucose  
30 103 as measured by HbA<sub>1c</sub> and the risk of death and of macrovascular and microvascular  
31 104 disease in patients with type 2 diabetes (T2DM) (10). In the landmark United Kingdom  
32 105 Prospective Diabetes Study, intensive glycaemic control that aimed to achieve a HbA<sub>1c</sub> level  
33 106 of 7% or below was associated with improved outcome in newly diagnosed patients with  
34 107 type 2 diabetes (T2DM) (11). This finding was then extrapolated to all patients with T2DM,  
35 108 and as a result, lower HbA<sub>1c</sub> levels were recommended for management of patients with  
36 109 T2DM. However, concerns arose as data from the Action to Control Cardiovascular Risk in  
37 110 Diabetes (ACCORD) trial began to emerge showing increased all-cause mortality and  
38 111 cardiovascular mortality in the intensive treatment group who were treated with  
39 112 antihyperglycaemic agents aiming for a lower HbA<sub>1c</sub> target of 6% compared with  
40 113 conventional antihyperglycaemic treatment in patients with T2DM aiming for HbA<sub>1c</sub> of 7-  
41 114 7.9%. These results led to early termination of the trial (12). Further studies (13,14) have

1  
2  
3 115 demonstrated that lower and higher mean HbA1c values were associated with an increased  
4 116 risk of cardiovascular events and mortality suggesting a “Goldilocks’ or ‘lagom” state of  
5 117 HbA1c is the optimal.  
6  
7  
8 118

9 119 Similar “U” shaped associations with HbA1c and all-cause mortality have also been shown  
10 120 for type 1 diabetes (15). Even in patients without diabetes, extremes of glycaemia as  
11 121 measured by HbA1c are associated with adverse clinical outcomes including cardiovascular  
12 122 events and all-cause mortality. Similar increases in mortality in either extremes are seen  
13 123 with body weight, blood pressure, birth weight, cholesterol and other cardiovascular risk  
14 124 factors.  
15  
16  
17  
18  
19 125

### 20 126 Goldilocks and Lagom

21 127 The Goldilocks zone has been defined mathematically by (16) in the context of xenobiotic  
22 128 ligand binding to nuclear receptors as a ‘*Non-monotonic receptor-mediated dose-response*  
23 129 *curve*’ (NMDRC), and by (17) in the context of endocrine disrupting chemicals as ‘a  
24 130 *response where the slope of the curve changes sign from positive to negative or vice versa*  
25 131 *somewhere along the range of doses examined*’. These are valuable definitions because  
26 132 they can be applied to all non-linear distributions including U-shaped, inverted U-shaped, J-  
27 133 shaped, sigmoidal and reverse sigmoidal.  
28  
29  
30  
31  
32  
33

34 134 The U-shaped curve is probably the most widely observed. It usually refers to the nonlinear  
35 135 relationship between two variables, in particular, a dependent and an independent variable.  
36 136 Because many analytical methods assume an underlying linear relationship, systematic  
37 137 deviation from linearity can lead to bias in estimation of safe levels in exposure to nutrients,  
38 138 drugs or toxic agents (for a discussion see section on *Mechanisms* below and (17)).  
39  
40  
41  
42 139

### 43 140 How widespread is the presence of a Goldilocks zone in biology and medicine?

44  
45 141 We thought it might be instructive to discover how widely the notion of a ‘Goldilocks zone’ is  
46 142 a feature of the wider biological literature, especially as applied to medicine. A  
47 143 comprehensive search for information conducted on the *PubMed* database in early 2018  
48 144 using the term ‘Goldilocks’ revealed 184 entries, all of which have been examined, together  
49 145 with the grey literature. Only articles in English language were selected. A selection of 43 of  
50 146 these publications has been presented (Appendix 1) as representative of the range of  
51 147 phenomena which invoke the Goldilocks concept in order to increase biological and clinical  
52 148 understanding. It should be emphasised that this is a narrative review rather than systematic  
53 149 review and no judgement on the quality of these studies or of those which have been omitted  
54  
55  
56  
57  
58  
59  
60

1  
2  
3 150 is implied. Patient/public involvement: No members of the public, nor patients were involved  
4 151 in the synthesis of this manuscript.

5 152  
6  
7  
8 153 Inspection of these examples reveals the wide range of biological and clinical phenomena in  
9 154 which Goldilocks zones have been found including the health and social sciences which can  
10 155 be qualitative rather than quantitative. It seems likely that a vast number remain to be  
11 156 discovered and that authors could, in a relatively simple manner, derive added value from  
12 157 their existing data by presenting distributions rather than median/mean values, and making  
13 158 raw data available to the research community via online repositories. This would allow  
14 159 systematic re-analysis by data scientists with an interest in the Goldilocks/Lagom concept.

15 160  
16 161  
17 162

### 18 162 Mechanisms underlying the Goldilocks Principle and what is Lagom

19 163

#### 20 164 *Mechanisms which are global in scope*

21 165 We previously proposed an explanation that may account for Goldilocks/Lagom phenomena,  
22 166 derived from our work on energy efficiency in early mammalian embryo development (8)  
23 167 which made use of an account of general aspects of biological optimisation by (18). The  
24 168 premise was that living things aim to function with the minimum input of energy, i.e., with  
25 169 high energetic efficiency. To accomplish this will obviously require a threshold level of  
26 170 metabolic activity to ensure a given process proceeds in an optimum, yet efficient manner,  
27 171 while the upper limit will be set by the capacity to increase metabolism vs *'the energy*  
28 172 *parsimony in almost everything (living things) do'* (18). The Goldilocks/Lagom zone will  
29 173 obviously lie between these extremes. The boundaries will be set by homeostatic  
30 174 mechanisms at all levels of organisation. Such boundaries will be flexible in order to allow for  
31 175 the capacity to up- or down-regulate metabolism in response to stress. Responses of these  
32 176 types have been usefully categorised by ecologists to distinguish (a) modest changes in  
33 177 metabolism (up or down within the *optimum* (Goldilocks/Lagom) range) from which the  
34 178 cell/organism can recover (the so-called *Pejus* range) and (b) extreme perturbation beyond  
35 179 the optimum which shifts metabolism irreversibly into a *Pessimum* range which is fatal (see  
36 180 Fig 1 in the work of Sokolova (19)

37 181

38 182 Some *specific mechanisms* for the production of non-monotonic receptor-mediated dose-  
39 183 response curves (NMDRCs) were well summarised by (17) in terms of the effect of  
40 184 endocrine disrupting chemicals, notably Bisphenol A on cells in culture, whole organisms,  
41 185 laboratory animals and human populations. Interestingly, it was reported that NMDRCs were

1  
2  
3 186 common, comprising 20-30% of all studies examined, depending on the conditions; e.g., in  
4  
5 187 vivo vs in vitro. Mechanisms considered included cytotoxicity (20), inhibition of cell  
6  
7 188 proliferation (21); hormone receptors produced vs degraded (22); cell and tissue specific co-  
8  
9 189 factors (23) and pharmacological effects. At the whole body level, examples of NMDRCs in  
10  
11 190 nutrition are widespread, reflecting minimum requirements at the lower end of the distribution  
12  
13 191 and toxicity at the higher, for example, vitamin A. Vandenberg (17) concludes that '*strong*  
14  
15 192 *evidence for Non-monotonic receptor-mediated dose-response curves*' - - *question the*  
16  
17 193 *current risk assessment practice where 'safe' levels are predicted from high dose exposures*'

### 19 196 *Conclusion*

20 197  
21  
22 198 There has long been a fixation in the biological and clinical research communities with  
23  
24 199 presenting data solely as measures of dispersion (means and medians) and of central  
25  
26 200 tendency (e.g., standard deviation and interquartile range). We believe that the retrospective  
27  
28 201 analysis of existing data could reveal numerous potential relationships with a  
29  
30 202 Goldilocks/Lagom pattern.

31 203 Interestingly, the editors of the British Journal of Pharmacology ' (2) '*will now require that,*  
32  
33 204 *where possible, numerical data (whether categorical or continuous), particularly involving*  
34  
35 205 *two sets or paired data, should be presented using scatter-plots, before-after graphs, and*  
36  
37 206 *other forms in which each individual 'n' value is individually plotted, rather than using bar*  
38  
39 207 *charts. Authors presenting data as bar charts should state that a scatter plot or before-after*  
40  
41 208 *charts did not reveal unusual or interesting aspects of the data not obvious from the bar*  
42  
43 209 *chart*'.

44 210  
45 211 We believe the Journal should be complimented on this approach and urge all such journals  
46  
47 212 to adopt it.

### 48 213 *Author contributions:*

49 214  
50 215 H J Leese; conceived the study, conducted literature searches and wrote the first draft. All  
51  
52 216 authors then commented on subsequent drafts. V Allgar; provided statistical advice, DR  
53  
54 217 Brison; contributed to the initial concept and provided new material, as did RG Sturmeay who  
55  
56 218 also prepared the manuscript for submission T Sathyapalan; contributed to initial concept;  
57  
58 219 provided new material and clinical expertise  
59  
60 220

### 61 221 *Competing Interests:*

62 222 The authors have no competing interests to declare in relation to this work.  
63  
64 223

224 Funding:

225 No specific funding was awarded for this research.

226

## 227 References

228

- 229 1. Weissgerber TL, Milic NM, Winham SJ, Garovic VD. Beyond Bar and Line Graphs:  
230 Time for a New Data Presentation Paradigm. *PLoS Biol.* 2015;13(4):1–10.
- 231 2. George CH, Stanford SC, Alexander S, Cirino G, Docherty JR, Giembycz MA, et al.  
232 Updating the guidelines for data transparency in the *British Journal of Pharmacology* -  
233 data sharing and the use of scatter plots instead of bar charts. *Br J Pharmacol*  
234 [Internet]. 2017 Sep 1 [cited 2018 Oct 4];174(17):2801–4. Available from:  
235 <http://doi.wiley.com/10.1111/bph.13925>
- 236 3. Roche DG, Careau V, Binning SA. Demystifying animal “personality” (or not): why  
237 individual variation matters to experimental biologists. *J Exp Biol* [Internet]. 2016 Dec  
238 15 [cited 2018 Oct 4];219(Pt 24):3832–43. Available from:  
239 <http://www.ncbi.nlm.nih.gov/pubmed/27852750>
- 240 4. Gould SJ. The Median Isn't the Message [Internet]. [cited 2018 Oct 4]. Available from:  
241 [https://people.umass.edu/biep540w/pdf/Stephen\\_Jay\\_Gould.pdf](https://people.umass.edu/biep540w/pdf/Stephen_Jay_Gould.pdf)
- 242 5. Hayes JP, Jenkins SH. Individual Variation in Mammals. *J Mammal* [Internet]. 1997  
243 May 21 [cited 2018 Oct 4];78(2):274–93. Available from:  
244 <https://academic.oup.com/jmammal/article-lookup/doi/10.2307/1382882>
- 245 6. Lloyd-Smith JO, Schreiber SJ, Kopp PE, Getz WM. Superspreading and the effect of  
246 individual variation on disease emergence. *Nature* [Internet]. 2005 Nov 17 [cited 2018  
247 Oct 4];438(7066):355–9. Available from: <http://www.nature.com/articles/nature04153>
- 248 7. Guerif F, McKeegan P, Leese HJ, Sturmev RG. A Simple Approach for COnsumption  
249 and RElease (CORE) Analysis of Metabolic Activity in Single Mammalian Embryos.  
250 *PLoS One.* 2013;8(8).
- 251 8. Leese HJ, Guerif F, Allgar V, Brison DR, Lundin K, Sturmev RG. Biological  
252 optimization, the Goldilocks principle, and how much is lagom in the preimplantation  
253 embryo. *Mol Reprod Dev.* 2016;83(9).
- 254 9. American Diabetes Association AD. Diagnosis and classification of diabetes mellitus.  
255 *Diabetes Care* [Internet]. 2011 Jan 1 [cited 2018 Oct 4];34 Suppl 1(Supplement  
256 1):S62-9. Available from: <http://www.ncbi.nlm.nih.gov/pubmed/21193628>
- 257 10. Khaw K-T, Wareham N. Glycated hemoglobin as a marker of cardiovascular risk. *Curr*  
258 *Opin Lipidol* [Internet]. 2006 Dec [cited 2018 Oct 4];17(6):637–43. Available from:  
259 <https://insights.ovid.com/crossref?an=00041433-200612000-00006>
- 260 11. Intensive blood-glucose control with sulphonylureas or insulin compared with



- 1  
2  
3 261 conventional treatment and risk of complications in patients with type 2 diabetes  
4 (UKPDS 33). *Lancet* [Internet]. 1998 Sep 12 [cited 2018 Oct 4];352(9131):837–53.  
5 262 Available from:  
6 263 <https://www.sciencedirect.com/science/article/pii/S0140673698070196?via%3Dihub>  
7 264  
8 265 12. Duckworth W, Abraira C, Moritz T, Reda D, Emanuele N, Reaven PD, et al. Glucose  
9 266 Control and Vascular Complications in Veterans with Type 2 Diabetes. *N Engl J Med*  
10 267 [Internet]. 2009 Jan 8 [cited 2018 Oct 4];360(2):129–39. Available from:  
11 268 <http://www.nejm.org/doi/abs/10.1056/NEJMoa0808431>  
12 269 13. Currie CJ, Peters JR, Tynan A, Evans M, Heine RJ, Bracco OL, et al. Survival as a  
13 270 function of HbA1c in people with type 2 diabetes: a retrospective cohort study. *Lancet*.  
14 271 2010;375(9713):481–9.  
15 272 14. Forbes A, Murrells T, Mulnier H, Sinclair AJ. Mean HbA 1c , HbA 1c variability, and  
16 273 mortality in people with diabetes aged 70 years and older: a retrospective cohort  
17 274 study. *Lancet Diabetes Endocrinol* [Internet]. 2018;6(6):476–86. Available from:  
18 275 [http://dx.doi.org/10.1016/S2213-8587\(18\)30048-2](http://dx.doi.org/10.1016/S2213-8587(18)30048-2)  
19 276 15. Schoenaker DAJM, Simon D, Chaturvedi N, Fuller JH, Soedamah-Muthu SS.  
20 277 Glycemic Control and All-Cause Mortality Risk in Type 1 Diabetes Patients: The  
21 278 EURODIAB Prospective Complications Study. *J Clin Endocrinol Metab* [Internet].  
22 279 2014 Mar 1 [cited 2018 Oct 4];99(3):800–7. Available from:  
23 280 <https://academic.oup.com/jcem/article-lookup/doi/10.1210/jc.2013-2824>  
24 281 16. Kohn MC, Melnick RL. Biochemical origins of the non-monotonic receptor-mediated  
25 282 dose-response [Internet]. Vol. 29, *Journal of Molecular Endocrinology*. 2002 [cited  
26 283 2018 Oct 4]. Available from: <http://www.endocrinology.org>  
27 284 17. Vandenberg LN. Non-monotonic dose responses in studies of endocrine disrupting  
28 285 chemicals: bisphenol a as a case study. *Dose Response* [Internet]. 2014 May [cited  
29 286 2018 Oct 4];12(2):259–76. Available from:  
30 287 <http://www.ncbi.nlm.nih.gov/pubmed/24910584>  
31 288 18. Johnson AT. Teaching the principle of biological optimization. *J Biol Eng* [Internet].  
32 289 2013 Feb 20 [cited 2018 Oct 4];7(1):6. Available from:  
33 290 <http://jbioleng.biomedcentral.com/articles/10.1186/1754-1611-7-6>  
34 291 19. Sokolova IM. Energy-Limited Tolerance to Stress as a Conceptual Framework to  
35 292 Integrate the Effects of Multiple Stressors. *Integr Comp Biol* [Internet]. 2013 Oct 1  
36 293 [cited 2018 Oct 4];53(4):597–608. Available from:  
37 294 <https://academic.oup.com/icb/article-lookup/doi/10.1093/icb/ict028>  
38 295 20. Welshons W V, Thayer KA, Judy BM, Taylor JA, Curran EM, Vom Saal FS. Large  
39 296 Effects from Small Exposures. I. Mechanisms for Endocrine-Disrupting Chemicals  
40 297 with Estrogenic Activity. 2003 [cited 2018 Oct 8];111. Available from: <http://dx.doi.org/>



- 1  
2  
3 298 21. SOTO AM, SONNENSCHNEIN C, PRECHTL N, WEILL B, OLEA N. Methods to  
4 299 Screen Estrogen-Agonists and Antagonists. J Med Food [Internet]. 1999 Jan [cited  
5 300 2018 Oct 8];2(3–4):139–42. Available from:  
6 301 <http://www.liebertpub.com/doi/10.1089/jmf.1999.2.139>  
7  
8 302 22. Ismail A, Nawaz Z. Nuclear hormone receptor degradation and gene transcription: An  
9 303 update. IUBMB Life (International Union Biochem Mol Biol Life) [Internet]. 2005 Jul 1  
10 304 [cited 2018 Oct 8];57(7):483–90. Available from:  
11 305 <http://doi.wiley.com/10.1080/15216540500147163>  
12  
13 306 23. Jeyakumar M, Webb P, Baxter JD, Scanlan TS, Katzenellenbogen JA. Quantification  
14 307 of Ligand-Regulated Nuclear Receptor Corepressor and Coactivator Binding, Key  
15 308 Interactions Determining Ligand Potency and Efficacy for Thyroid Hormone Receptor.  
16 309 Biochemistry [Internet]. 2008 [cited 2018 Oct 8];47(28):7465–76. Available from:  
17 310 <https://www.ncbi.nlm.nih.gov/pmc/articles/PMC2574600/pdf/nihms57470.pdf>  
18  
19 311  
20 312  
21  
22 313  
23  
24 314  
25  
26  
27  
28  
29  
30  
31  
32  
33  
34  
35  
36  
37  
38  
39  
40  
41  
42  
43  
44  
45  
46  
47  
48  
49  
50  
51  
52  
53  
54  
55  
56  
57  
58  
59  
60

1  
2  
3 315 Fig 1; An illustrative example of a comparison of cell lines is described in Figure 1, which  
4 316 shows that bar charts do not give the reader adequate information on the variability and  
5 317 distribution of each sampled 'n'.  
6  
7

8 318  
9

10 319  
11

12 320  
13

14 321  
15

16 322  
17  
18  
19  
20  
21  
22  
23  
24  
25  
26  
27  
28  
29  
30  
31  
32  
33  
34  
35  
36  
37  
38  
39  
40  
41  
42  
43  
44  
45  
46  
47  
48  
49  
50  
51  
52  
53  
54  
55  
56  
57  
58  
59  
60

For peer review only



## Appendix 1

*Cell/molecular biological Goldilocks zones*

- The level of the signal molecule mTOR which ensures proper functioning of the anti-tumour agent *Treg* in immune cells: Zeng (2017) –
- Appropriate proximity to the ‘niche’ environment in the crypt region of the colon in order to ensure the persistence of stem cell potential: Walther and Graham (2014)
- The need for microbial communities to be neither too distant nor too close for high levels of emergent biosynthetic capacity to occur (Chiu et al 2014)
- The need to maintain a balance in the expression, activation and repression of Pattern Recognition Receptors in order to promote immune system homeostasis in the GI tract: (Ringel-Scala et al 2016)
- An appropriate balance of the highly gene-dosage-sensitive Notch pathway, a fundamental signalling mechanism required for differentiation and tissue homeostasis; too much or too little can lead to disease. (Braune and Lendahl 2016)
- ‘Goldilocks’, is the name applied to the Python computer package which takes a census of gene sequence data to identify genomic regions which are ‘just right’ (Nicholls et al, 2013)
- Mechanoresponsive proteins have Goldilocks zones of actin binding affinity in order to carry out cytoskeleton reorganisation in response to changing mechanical environments. (Schiffhauer et al 2015)
- Understanding *Mycobacterium tuberculosis* infection requires information on the balance of key chemokines/cytokines and their receptors and how loss of that balance can promote disease (Domingo-Gonzalez et al 2016).
- The ideal ‘Goldilocks’ Chemistry allows DNA and RNA to carry out their fundamental function in molecular heredity (Houlihan et al 2017)
- An allosteric Serine- Arginine protein -phosphatase platform which balances phosphorylation levels in a ‘goldilocks region’ is required for the proper sub-nuclear stage of a protein kinase protein splicing factor (Aubot et al 2017)
- Methyl-CpG-binding protein (MeCP2) must stay within a narrow range of expression – not too much, not too little – to be functionally ‘just right’ for proper epigenetic regulation in order to limit devastating phenotypic outcomes (immune defects underlying neurological deficits) (Boothby and Williams, 2012)
- Undifferentiated Embryonic Cell Transcription Factor (Utf1) ensures that conditions are precisely right for maintaining pluripotency and self-renewal in embryonic stem cells (Laskowski and Knoepfler 2012)

*Tissue/whole body biology applied in medicine Goldilocks zones*

- To minimise the risk of bone fractures, vitamin D levels need to be between 'lower' and 'higher', both of which increase the risk (Baughman and Lower 2014)
- A high and low proportion of carbohydrate in the diet is associated with increased human mortality, with minimal risk at 50-55% carbohydrate intake (Seidelmann et al 2018)
- Appropriate redox balance in striated muscle, where ROS production is counterbalanced by antioxidant capacity requires a Goldilocks zone, which scales down from the whole tissue to mitochondrial level: Alleman et al 2014)
- Optimal development of advanced therapeutic medicinal products for bone repair need to be neither too simple nor too complex (Leijten et al 2015)
- Appropriate timing, dose and regimen of estrogen exposure is required to promote beneficial effects on cognition (Koenle and Bimonte-Nelson, 2015)
- Vitamin C concentrations which are 'just right' (especially not unphysiologically high) are needed in order to interpret effects of the vitamin on human physiology (Padayatty and Levine, 2016)
- Recommendations for post-polypectomy surveillance should aim to target a Goldilocks zone (Ladabaum and Schoen, 2016)
- The need to balance fetal needs vs maternal supply during pregnancy in great apes and humans in terms of the level of inflammation; is essential during implantation; otherwise there is the risk of disorders such as gestational diabetes and choriodecidual inflammatory syndrome (Clancy, 2013).
- With regard to fluid management around the time of surgery – too little (pre- and post- operatively) is associated with inadequate organ perfusion and too much, with tissue oedema and surgical complications. Finding the 'Goldilocksian' 'just right' zone is the challenge (Cuthbertson, 2013).
- Judicious surgery for breast cancer indicates that a 2mm margin is superior to a narrower one in patients with Ductal Carcinoma In Situ and that bigger is not necessarily better (Jagsi 2016)
- Networks of neurones need to stay in a Goldilocks zone between 'too quiet' and 'too active' (Humphries 2016).
- The 'Goldilocks zone' of fatty acid metabolism is required to ensure that the relationship with cardiac function is just right. (Kerr et al 2017).

- 1  
2  
3 • In emergency medicine a balance needs to be struck between the speed of  
4 treatment and its accuracy – sicker patients are more likely to benefit from  
5 intervention whereas less sick do not and may be harmed. It is necessary to get into  
6 the *Goldilocks zone*; the ‘just right’ balance between speed and accuracy (Fatovich,  
7 2017)  
8
- 9  
10 • In the use of exercise to maintain joint homeostasis in the horse, too little or too  
11 much can result in joint derangement whereas just the right amount will provide  
12 optimal functioning of the joint (Milner 2017).  
13
- 14 • In the treatment of perioperative blood pressure, the anaesthetist should aim at the  
15 ‘Goldilocks’ range, reminiscent of the optimal haemoglobin concentration, and avoid  
16 excursions in either direction (Sweitzer and Howell, 2017)  
17
- 18 • ‘Goldilocks’ software is used in facilitating hearing-aid self-fitting *to allow user*  
19 *exploration and selection of preferred levels of overall output, low-frequency cut and*  
20 *high frequency boost.* (Boothroyd et al 2017).  
21
- 22 • In the administration of oxygen in the clinical situation, the move is to avoid both  
23 excessive and inadequate therapy – moving away from the notion that more is  
24 always better and instead giving the least amount necessary (Martin and Grocott  
25 2017).  
26
- 27 • A ‘Goldilocks trial design’ constantly asks *‘Is the sample size too big, too small or just*  
28 *right?’* As an example, Broglio et al (2014) present a Bayesian adaptive design for a  
29 confirmatory trial to select a trial’s sample size based on accumulating data  
30
- 31 • The Goldilocks dilemma in acute ischemic stroke asks which patients are ‘just right’  
32 for endovascular treatments (Tansy and Liebeskind 2013)  
33
- 34 • Excess or deficiency of retinoic acid leads to inner ear dysmorphogenesis via an  
35 effect on FGF3/1`1`2121FGF10 signalling; referred to as a Goldilocks phenomenon  
36 (Frenz et al 2010)  
37
- 38 • For patients with newly diagnosed glioblastoma, the goal is to define the ‘Goldilocks  
39 zone’ for the optimal duration of adjuvant temozolomide (Grossman and Keleinberg  
40 2017)  
41
- 42 • Following lung injury, different progenitor cell populations can arise depending on the  
43 molecular environment – resulting in normal or aberrant alveolar repair. A key  
44 question is how to maintain a ‘Goldilocks zone’ of repair (Dean and Lloyd 2017) –  
45 nice diagram  
46
- 47 • The design of inferior vena cava filters for the treatment of Venous thromboembolic  
48 disease relies on a ‘Goldilocks’ premise: i.e., make the device stable, (so it doesn’t  
49 migrate) but not too stable (so you can still retrieve it) (Magnowski et al 2017)  
50  
51  
52  
53  
54  
55  
56  
57  
58  
59  
60

- Genetic variation in humans occurs through different types of alleles; at one extreme are mutations that cause Mendelian disease such as familial hypercholesterolemia arising from mutations in the LDL receptor with powerful phenotypic effects; at the other are common alleles (eg. ApoE) with small phenotypic effects. In the middle are 'Goldilocks alleles' (e.g., PCSK9) where the mutations are common enough to be useful in epidemiological analyses (in contrast to Mendelian) but still produce detectable biochemical effects. (Cohen, 2013)
- Fetal androgen production, especially testosterone, needs to be 'just right' to ensure the appropriate developmental trajectory of the fetus and offspring, while inappropriate fetal androgen or androgen signalling – both too little and too much - is associated with disorders of male reproductive development as well as being implicated in Polycystic Ovarian Syndrome in women (Fowler and O'Shaughnessy 2013).

#### *Human Behaviour Goldilocks zones*

- Social auditory stimuli intermediate between 'predictable' and 'complex' best serve the selective attention of 7-8-month old infants: Kidd et al (2016)
- An optimal amount of social interactivity of television watching promotes children's visual attention and word learning (Nussenbaum and Amso, 2016).
- When considering the wellbeing of adolescents, 'too little' digital screen use may deprive them of important social information and peer pursuits whereas 'too much' may displace other meaningful activities (Przybylski and Weinstein 2017)

#### *Human educational training needs Goldilocks zones*

- The degree of specialisation required to ensure the acquisition of professional competences in Paediatric Psychological training (Steele et al 2014)

#### *Healthcare*

- The 'Goldilocks point' in Palliative Care refers to exactly the right time to mobilise specialist hospital/palliative care services for the patient sub-group who will derive the most benefit. (LeBlanc et al 2014)
- The Goldilocks Principle is invoked in the regulation of healthcare to make sure it is not too little, nor too much but 'just right': Kemple (2016)

- The need for Children's Health Insurance to provide 'just the right health outcomes, just the right patient care experience and just the right costs': Szilagyi (2015)

Zeng H. (2017) mTOR signalling in immune cells and its implications for cancer immunotherapy. *Cancer Letters*; 408: 182-189

Walther V, Graham TA (2014) Location, location, location! The reality of life for an intestinal stem cell in the crypt. *J Pathol*; 234: 1-4.

Chiu H-C, Levy R, Borenstein E (2014). Emergent biosynthetic capacity in simple microbial communities. *PLOS Computational Biology*; 10: e1003695

Ringel-Scala VM, McDaniel DK, Allen IC (2016) The Goldilocks Conundrum: NLR inflammasome modulation of gastrointestinal inflammation during inflammatory bowel disease. *Crit Rev Immunol*; 36: 283-314

Braune EB, Lendahl U (2016) Notch- a goldilocks signalling pathway in disease and cancer therapy. *Discov Med*; 115: 189-196

Nicholls SM, Clare A and Randall JC (2013) Goldilocks: a tool for identifying regions that are 'just right'. *Bioinformatics*; 32: 2047-2049

Schiffhauer ES, Luo T, Mohan K, Srivastava V, Qian X, Griffis, ER Iglesias PA, Robinson DN (2016) Mechanoaccumulative elements of the mammalian actin cytoskeleton. *Curr Biol*; 26: 1473-1479.

Domingo-Gonzalez R, Prince O, Cooper A, Khader SA (2016) Cytokines and chemokines in *Mycobacterium tuberculosis* infection. *Microbiol Spectr*; 4 doi 10.1128/microbiolospec.TB2-0018-2016.

Houlihan G, Arangundy-Franklin S, Holliger P (2017). Exploring the chemistry of genetic information storage and propagation through polymerase engineering. *Acc Chem Res*; 50: 1079-1087

Aubot BE, Hailye KL, Fattet L, Jennings PA, Adams JA (2017) Redirecting SR protein nuclear trafficking through an allosteric platform. *J Mol Biol*; 429: 2178-2191

Boothby M, Williams GL (2012) The Goldilocks effect. *Sci Transl Med*; 4:163fs42

Laskowski AI Knoepfler PS (2012) Ubf1:Goldilocks for ES Bivalency. *Cell Stem Cell* 7:732-734



1  
2  
3 Baughman RP, Lower EE (2014) Goldilocks, vitamin D and sarcoidosis. *Arthritis Res Ther*  
4 16: 111-113  
5

6  
7  
8 Seidelmann SB, Claggett B, Cheng S, Henglin M, Shah A, Steffen LM, Folsom AR, Rimm  
9 EB, Willett Wc, Solomon SD (2018) Dietary carbohydrate intake and mortality: a prospective  
10 cohort study and meta-analysis. *The Lancet on line* August 16 2018  
11  
12 <http://cix.doi.org/10.1016/S2468-2667> (18)30135-X  
13

14  
15  
16 Alleman RJ, Katunge LA, Nelson MAM, Brown DA, Anderson EJ (2014). The 'Goldilocks  
17 Zone' from a redox perspective – Adaptive vs. deleterious responses to oxidative stress in  
18 striated muscle. *Frontiers in Physiology*; 5: 1-20.  
19

20  
21  
22 Leijten J, Chair YC, Papantoniou I, Gens L, Schrooten J, Luyten FP (2015). Cell-based  
23 advanced therapeutic medicinal products for bone repair: Keep it simple? *Advanced Drug*  
24 *Delivery Reviews* 84: 30-44  
25

26  
27  
28  
29  
30 Koebele SV, Bimonte-Nelson HA (2015). Trajectories and phenotypes with estrogen  
31 exposures across the lifespan: What does Goldilocks have to do with it? *Horm Behav* 74:  
32 86-104  
33

34  
35  
36 Padayatty SJ, Levine M (2016). Vitamin C physiology: the known and the unknown  
37 Goldilocks. *Oral Dis* 22: 463-493  
38

39  
40  
41 Ladabaum U, Schoen RE (2016) Post-polypectomy surveillance that would please Goldilocks  
42 – not too much, not too little, but just right. *Gastroenterology*; 150: 791-796.  
43

44  
45  
46 Clancy KBH (2007) Inflammation, Reproduction, and the Goldilocks Principle. In KBH  
47 Clancy, K Hinde, K and JN Rutherford: *Building babies: primate development in proximate*  
48 *and ultimate perspective. Developments in Primatology* 37, DOI 10.1007/978-1-4614-4060\_1  
49 Springer Science+Business Media New York, p4614-4060.  
50

51  
52  
53 Cuthbertson BH (2013) Goldilocks, elephants and surgical fluids. *Br J Anaesth*;110, 144–  
54 145, <https://doi.org/10.1093/bja/> ...  
55

56  
57  
58 Jagsi R (2016) Goldilocks and margins for DCIS: identifying 'just right'. *Practical radiation*  
59 *oncology* 6: 296-297.  
60

1  
2  
3  
4  
5 Humphries MD (2016) The Goldilocks zone in neural circuits. *eLife* 5: e22735  
6  
7

8 Kerr M, Dodd MS, Heather LC (2017) the 'Goldilocks zone' of fatty acid metabolism; to  
9 ensure that the relationship with cardiac function is just right. *Clin Sci* 131: 2079-2094.  
10  
11

12 Fatovich DM (2017). The time paradox of emergency medicine: another inverted U curve.  
13 *Emerg Med Australas* 29: 730-732.  
14  
15

16  
17 Milner PI (2017) Keeping joints healthy: The Goldilocks effect of exercise. *Veterinary Journal*  
18 226: 4-5.  
19  
20

21  
22 Sweitzer BJ, Howell SJ (2017) The Goldilocks principle as it applies to perioperative blood  
23 pressure: what is too high, too low, or just right? *Br J Anaesth* 119: 7-10  
24  
25

26  
27 Boothroyd A, Mackersie C (2017) A 'Goldilocks' approach to hearing-aid self-fitting: user  
28 interactions. *Am J Audiol*; 26: 430-435  
29  
30

31 Martin D, Grocott M (2017) Oxygen therapy and the Goldilocks principle. *J Intensive Care*  
32 *Soc* 18: 279-281  
33  
34

35  
36 Broglio KR, Connor JT, Berry SM (2014) Not too big, not too small: a goldilocks approach to  
37 sample size selection 24: 685-705  
38  
39

40  
41 Tansy AP, Liebeskind DS (2013). The goldilocks dilemma in acute ischemic stroke. *Front*  
42 *Neurol* 4: 164-166.  
43  
44

45  
46 Frenz DA, Liu W, Cveki A, Xie Q, Wassef L, Loredana Q, Niederreither K, Maconochie, M  
47 Shanske A (2010) Retinoid signalling in inner ear development: a 'Goldilocks' phenomenon.  
48 *Am J Med Genet A* 152A: 2947-2961  
49  
50

51  
52 Grossman SA, Kleinberg L (2017) A search for the 'Goldilocks zone' with regard to the  
53 optimal duration of adjuvant temozolomide in patients with glioblastoma. *Neuro-Oncology*  
54 19: 1019-1020  
55  
56

57  
58 Dean CH, Lloyd CM (2017) Lung alveolar repair: not all cells are equal. *Trends Mol Med* 23:  
59 871-873.  
60

1  
2  
3  
4  
5 Magnowski A, Brown M, Schramm K, Lindquist J, Rochun PJ, Johnson T (2017). The law of  
6 unintended consequences: current design challenges in inferior vena cava filters; *Expert*  
7 *Rev Med Devices* 14: 805-810  
8  
9

10  
11 Cohen JC (2013) Emerging LDL therapies: using human genetics to discover new  
12 therapeutic targets for plasmas lipids. *J Clin Lipidol* 7: S1-S5  
13  
14

15  
16 Fowler PA, O'Shaughnessy PJ (2013). The Goldilocks principle and developmental  
17 androgens in males; what is "just right"? *Endocrinology* 154: 1663-1671.  
18  
19

20  
21 Kidd C, Piantadosi ST, Aslin RN (2014) The Goldilocks effect in infant auditory attention.  
22 *Child Dev* 85: 1795-1804  
23  
24

25  
26 Nussenbaum K, Amso D (2016) An attentional Goldilocks effect: an optimal amount of social  
27 interactivity promotes word learning from video. *J Cogn Dev* 17: 30-40.  
28  
29

30  
31 Przybylski A, Weinstein N (2017) A large-scale test of the Goldilocks hypothesis: quantifying  
32 the relations between digital-screen use and the mental well-being of adolescents. *Psychol*  
33 *Sci* 28: 204-215  
34  
35

36  
37 Steele RG, Borner KB, Roberts MC (2014) Commentary: finding the middle bowl: Goldilocks'  
38 lessons on professional competences in pediatric psychology' *J Pediat Psychol* 39: 988-997  
39  
40

41  
42 LeBlanc TW, Currow DC, Abernethy AP (2014) On Goldilocks, care coordination, and  
43 palliative care: making it 'just right'. *Prim Care Respir J* 23: 8-10  
44

45  
46 Kemple T (2016) The Goldilocks problems in regulation. *BMJ* 2016; 354:i3778  
47

48  
49 Szilagyi PG (2015) The children's'. health insurance program and the Goldilocks effect.  
50 *Acad Pediatr* 15: S13-S14  
51  
52  
53  
54  
55  
56  
57  
58  
59  
60
